# Supplementary material for: Amelioration effect of water extract from Ganoderma resinaceum FQ23 solid-state fermentation fungal substance with high-yield ergothioneine on anxiety-like insomnia mice
Source: Royal Society of Chemistry journal article supplement (doi:10.1039/d2fo01847k), 2022-01-01
Supplement: d2fo01847k1.pdf [file d2fo01847k1.pdf]

## Supplementary information

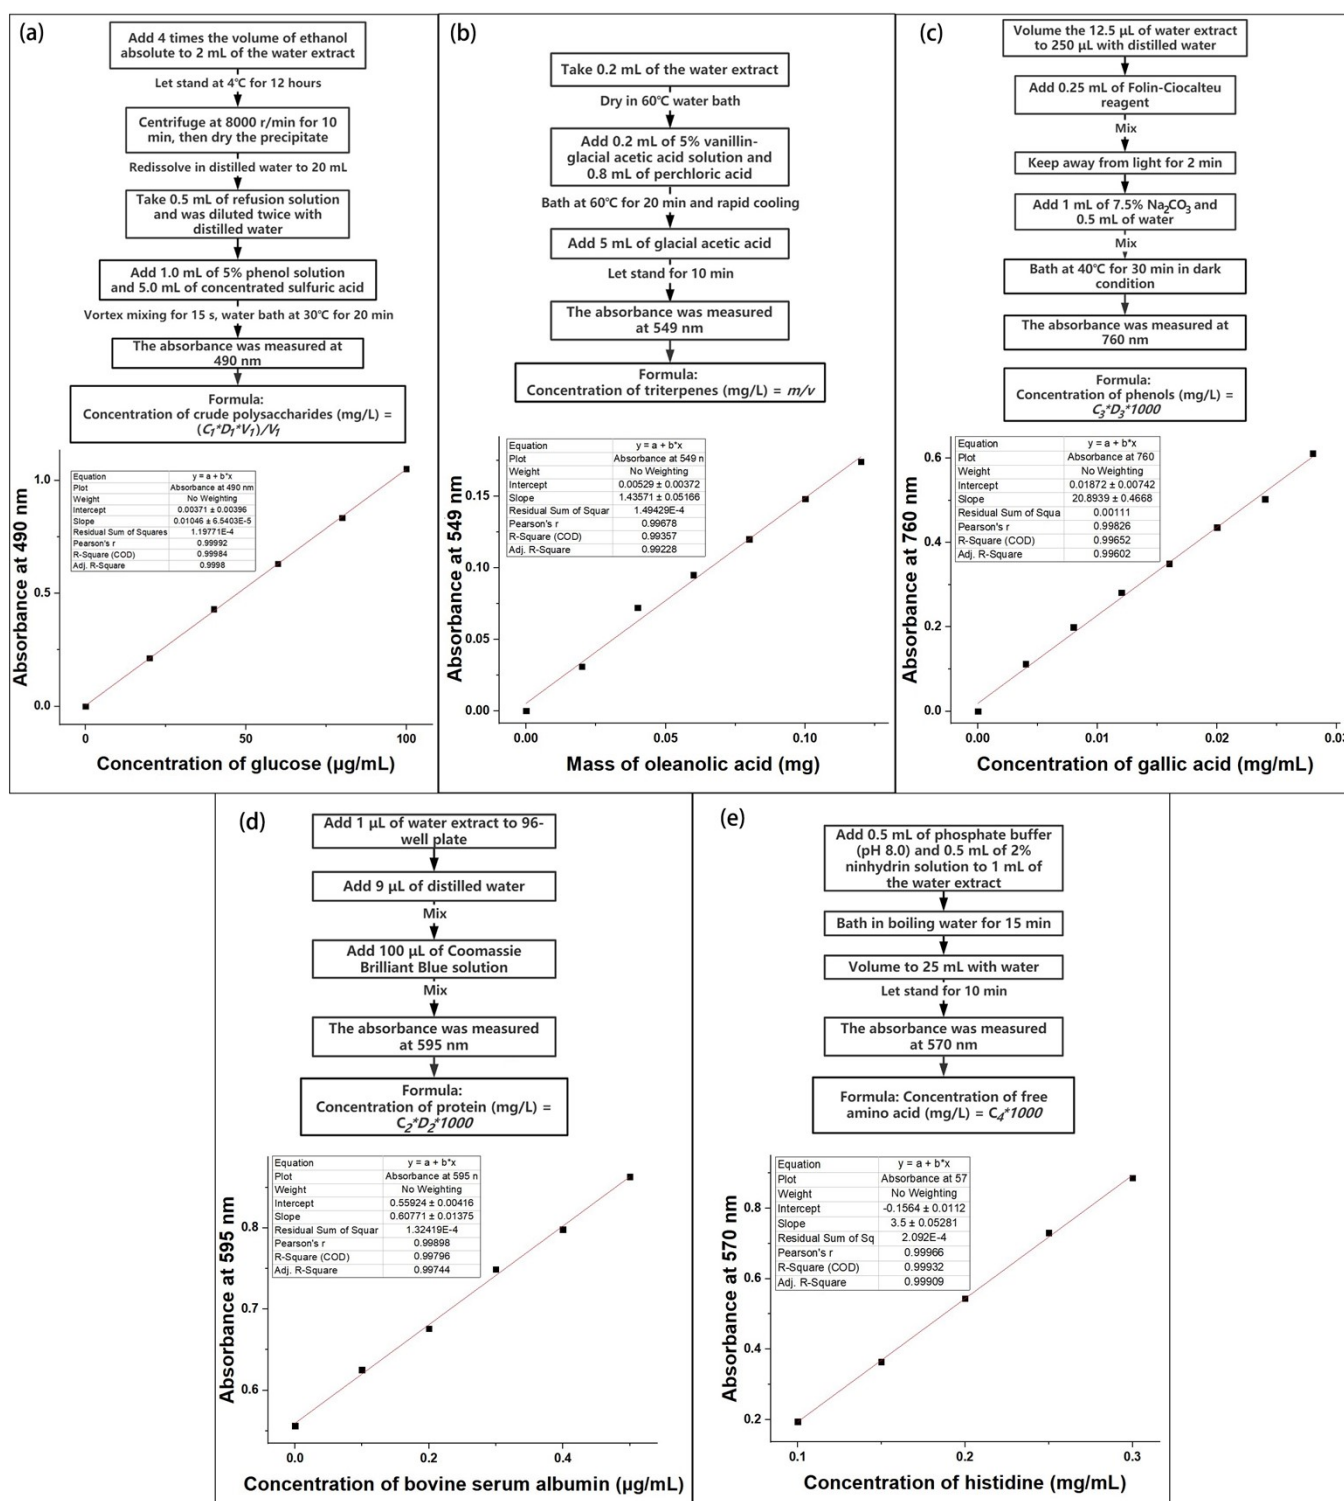

**Figure S1** The detection procedures and standard curves of (a) crude polysaccharides, (b) triterpenes, (c) phenols and (d) proteins and (e) free amino acids. (a) Using glucose as the standard to detect crude polysaccharide, in the formula,  $C_1$  is the concentration of the solution to be tested according to the standard curve (mg/L),  $D_1$  is the dilution multiple,  $V_1$  is the volume of the solution to be tested (L) and  $V_2$  is the volume of the precipitation to be redissolved (L); (b) Using oleanolic acid as the standard to detect triterpenes, in the formula,  $m$  is the mass of triterpenes in water extract calculated according to the standard curve (mg) and  $v$  is the volume of water extract (L); (c) Using gallic acid as the standard to detect phenols, in the formula,  $C_3$  is the concentration of the solution to be tested according to the standard curve (mg/mL),  $D_3$  is the dilution multiple; (d) Using bovine serum albumin as the standard to detect protein, in the formula,  $C_2$  is the concentration of the solution to be tested according to the standard curve (µg/µL),  $D_2$  is the dilution multiple; (e) Using histidine as the standard to detect free amino acid, in the formula,  $C_4$  is the concentration of the solution to be tested according to the standard curve (mg/mL).

**Table S1** The primer sequences used in qPCR

| Names of gene                                                      | Abbreviation              | primer sequences (5'- 3')                             | Amplicon (bp) |
|--------------------------------------------------------------------|---------------------------|-------------------------------------------------------|---------------|
| Tyrosine Kinase receptor B                                         | TrkB                      | F: CACGACGAACCTCTTGACTG<br>R: GACAATGCCAGAAGCGAGTTA   | 146           |
| cAMP-response element binding protein                              | CREB                      | F: CTACATAGTGAGATCCCTTA<br>R: ACAGCTACAGGAAGATAG      | 149           |
| Nuclear factor of kappa light polypeptide gene enhancer in B cells | NFκB                      | F: GAGTTTGGGAAGGATTTG<br>R: GTTCCAGGTCTGATTC          | 148           |
| Serotonin receptor 1A                                              | HTR-1A                    | F: CACTCACCTCTCACAGTATCCA<br>R: TTGCTCCTTACCTCCTCTACG | 119           |
| Gamma-aminobutyric acid receptor A                                 | GABAA                     | F: TGTTCTCAACGCAGTGATTCC<br>R: CCTCTGTCTATCTCCGTCTGA  | 199           |
| Na <sup>+</sup> -K <sup>+</sup> -Cl <sup>-</sup> cotransporter 1   | NKCC1                     | F: CAACTTTCAGGTGATGAG<br>R: GAAAGCTGGGTAGATATTG       | 151           |
| K <sup>+</sup> -Cl <sup>-</sup> cotransporter 2                    | KCC2                      | F: CTCTGATATCCCTCTCTT<br>R: TAAGACTCCATCCATACTC       | 152           |
| Glyceraldehyde-3-phosphate dehydrogenase                           | GAPDH<br>(reference gene) | F: CAAGCTCATTTCCTGGTATG<br>R: TTATTATGGGGGTCTGGGA     | 200           |
